# Supplementary material for: Maternal cardiac arrest secondary to choriosepsis after preterm premature rupture of membranes
Source: PubMed Central journal article supplement — CMAJ. 2022 Sep 12;194(35):E1209–13. doi: 10.1503/cmaj.212068 (PMC9477251; doi:10.1503/cmaj.212068), 2022-09-12
Supplement: 212068-case-1-at.pdf [file 212068-case-1-at.pdf]

| Selected risk factors for preterm rupture of membranes (PPROM) | Risk associated                                                                                                    |
|----------------------------------------------------------------|--------------------------------------------------------------------------------------------------------------------|
| Previous PPROM                                                 | RR 3.3 (3-fold increased risk; absolute risk 13.5% vs. 4.1%) <sup>1</sup>                                          |
| Previous PPROM leading to preterm birth                        | Risk of PPROM and preterm birth prior to 28 weeks gestation RR 13.5 (absolute risk 1.8% vs. 0.13%) <sup>1</sup>    |
| Previous preterm delivery                                      | OR 2.5 (2.5-fold increased risk) <sup>2</sup>                                                                      |
| Antepartum bleeding                                            | aOR 2.8 <sup>3</sup>                                                                                               |
| Gestational diabetes                                           | aOR 1.87 <sup>4</sup>                                                                                              |
| Pre-existing diabetes                                          | aOR 2.2 <sup>3</sup>                                                                                               |
| Nulliparity                                                    | aOR 2.52 <sup>4</sup>                                                                                              |
| Pre-pregnancy BMI <18.5 kg/m <sup>2</sup>                      | aOR 2.00 <sup>4</sup>                                                                                              |
| Infection                                                      | OR 6 for intra-amniotic infection, OR 3.7 for urinary tract infection, OR 7.6 for gonorrhea infection <sup>5</sup> |
| Bacterial vaginosis                                            | OR 7.3 <sup>6</sup>                                                                                                |
| Short interval of pregnancy (<6 months)                        | OR 1.8 <sup>7</sup>                                                                                                |
| Cervical procedures                                            | Cerclage: PPROM <24 weeks RR 2.03, PPROM <34 weeks RR 1.52, aOR 0.62 <sup>8</sup><br>LEEP: RR 2.37 <sup>9</sup>    |
| Amniocentesis                                                  | 0.24% increased risk up to 14 days following procedure <sup>10</sup>                                               |
| Twin gestation                                                 | OR 2.1 <sup>11</sup>                                                                                               |
| Black women                                                    | aOR 1.9 <sup>3</sup>                                                                                               |
| Hispanic women                                                 | aOR 1.7 <sup>3</sup>                                                                                               |
| Cigarette smoking                                              | OR 2.5 (2.5-fold increased risk) <sup>2</sup>                                                                      |
| Low level of education                                         | aOR 2.39 <sup>4</sup>                                                                                              |
| Polyhydramnios <sup>12</sup>                                   |                                                                                                                    |

Supplementary Table 1: Selected risk factors for preterm premature rupture of membranes, Abbreviations: PPROM = preterm premature rupture of membranes, aOR = adjusted odds ratio, LEEP = loop electric excision procedure

### References

- 1 Asrat T et al. Rate of recurrence of preterm premature rupture of membranes in consecutive pregnancies. *Am J Obstet Gynecol.* 1991;165(4):1111.
- 2 Harger JH et al. Risk factors for preterm premature rupture of fetal membranes: a multicenter case-control study. *Am J Obstet Gynecol.* 1990;163(1):130
- 3 Berkowitz GS, et al. Risk factors for preterm birth subtypes. *Epidemiology.* 1998;9(3):279
- 4 Bouvier D et al. Risk Factors and Outcomes of Preterm Premature Rupture of Membranes in a Cohort of 6968 Pregnant Women Prospectively Recruited. *J Clin Med.* 2019;8:1987
- 5 Ekwo EE, et al. Risks for premature rupture of amniotic membranes. *Int J Epidemiol.* 1993;22(3):495

- 6 Kurki T et al. Bacterial vaginosis in early pregnancy and pregnancy outcome. *Obstetrics & Gynecology*. 1992;80(2):173-177
- 7 Shree R, Caughey A, Chandrasekaran S. Short interpregnancy interval increases the risk of preterm premature rupture of membranes and early delivery. *J Matern Fetal Neonatal Med*. 2018;31(22):3014-3020
- 8 Rodriguez AM, Pastor A, Fox NS. The association between Shirodkar cerclage and preterm premature rupture of membranes in singleton pregnancies. *Am. J. Perinatol*. 2021;38(S01):e347-e350
- 9 Conner SN, Frey HA, Cahill AG, Macones GA, Colditz GA, Tuuli MG. Loop electrocervical excision procedure and risk of preterm birth: a systematic review and meta-analysis. *Obstet Gynecol*. 2014; 123(4):752-761
- 10 Hsu WW, Hsieh CJ, Lee CN, Chen CL, Ling MW, Kang J, et al. Complications after chorionic villous sampling and midtrimester amniocentesis: a 7-year national registry study. *J Formos Med Assoc*. 2019; 118(7):1107-1113
- 11 Mercer BM, Crocker LG, Pierce WF, Sibai BM. Clinical characteristics and outcome of twin gestation complicated by preterm premature rupture of membranes. *Am J Obstet Gynecol*. 1993; 168(5):1467-1473
- 12 Menon R, Richardson LS. Preterm prelabor rupture of the membranes: A disease of the fetal membranes. in *Seminars in Perinatology*. 409– 419. (2017).
